# Supplementary material
Source: PubMed Central journal article supplement (PMC8159900)
Supplement: NIHMS1692877-supplement-Supplemental_Publication_Material.pdf [file NIHMS1692877-supplement-Supplemental_Publication_Material.pdf]

## SUPPLEMENTAL MATERIALS

### **ADAM17 boosts cholesterol efflux and downstream effects of HDL on inflammatory pathways in macrophages**

Vishal Kothari<sup>1</sup>, Jingjing Tang<sup>1</sup>, Yi He<sup>1</sup>, Farah Kramer<sup>1</sup>, Jenny E. Kanter<sup>1</sup> and Karin E. Bornfeldt<sup>1,2,\*</sup>

<sup>1</sup> Department of Medicine, Division of Metabolism, Endocrinology and Nutrition, UW Medicine Diabetes Institute,

<sup>2</sup> Department of Laboratory Medicine and Pathology, University of Washington, Seattle, WA 98019

## Supplemental methods

### Mice

Animals were kept under specific pathogen-free conditions with ad libitum access to food and water. Mice were fed a standard laboratory diet (Purina Mills diet 5053). Housing temperatures were kept within a range of 71-73°F (21.7-22.8°C). Water and cages were autoclaved, and cages were changed weekly. The health status of the mice was monitored using a dirty bedding sentinel program and no health status issues or changes in immune status were identified. It has been reported that male *APOA1<sup>Tg</sup>* mice have higher plasma APOA1 levels than female mice.<sup>1</sup> Thus, to evaluate the effects on macrophage inflammatory properties by high levels of circulating HDL, we used male *APOA1<sup>Tg</sup>* mice for all experiments. For consistency, we used male *Lyz2<sup>Cre/Cre</sup>*; *Adam17<sup>Wt/Wt</sup>* and *Lyz2<sup>Cre/Cre</sup>*; *Adam17<sup>fl/fl</sup>* mice for transplants and for experiments with bone marrow derived macrophages (BMDMs). Since we did not observe any differences between male and female mice in cell culture experiment with BMDMs from C57BL/6J mice, data from either male or female mice are shown, as described in the figure legends.

### Isolation and culture of macrophages

BMDMs were obtained by isolating bone marrow cells from femurs and tibias of male and female mice and culturing the cells in RPMI1640 (Corning, Tewksbury, MA) supplemented with 30% L929-conditioned medium, 7% FBS (Thermo Fisher Scientific, Waltham, MA), and 1% penicillin-streptomycin (Thermo Fisher Scientific) in tissue culture plates (Thermo Fisher Scientific). Fresh medium was added on day 3 and day 5.

### Quantitative PCR

Macrophages were washed twice with cold PBS and lysed in RNA lysis buffer (Zymo Research, Irvine, CA). RNA was isolated using RNA MiniPrep kits (Zymo Research), according to the manufacturer's protocol. cDNA was prepared using first strand synthesis kits (Thermo Fisher Scientific), and quantitative PCR (qPCR) was performed on an ABI 7900HT fast real-time PCR System (Applied Biosystems, CA) with SYBR reagents (Thermo Fisher Scientific). Assays were performed in 384-well plates with the following contents/well: 7.5 µl of PCR Master mix (Thermo Scientific, Cat # K0223), 4.3 µl of sterile water, 0.1 µl of each set of forward and reverse primers (0.13 µM final concentration of each) and 3 µl of DNA template, for a total reaction volume of 15 µl. Cycles included: one 2-min hold (50°C); a 10-min denaturation (95°C); and 40 cycles of denaturation (95°C for 30 s), annealing (60°C for 1 min), and extension (72°C for 30 s). The housekeeping gene *Rn18s* was used to account for variability in the initial quantities of mRNA.

### HDL isolation from mouse plasma

HDL (density 1.125–1.21 g/ml) was isolated from EDTA plasma of *APOA1<sup>Tg</sup>*; *Ldlr<sup>-/-</sup>* mice by density gradient ultracentrifugation. Briefly, 335 µl of plasma was adjusted to a density of 1.21 g/ml by solid KBr, underlaid with 150 µl of KBr solution with a density of 1.21 g/ml, and spun at 511,260 x g at 5°C for 4.5 hr in a T120.1 rotor (Beckman Coulter, Pasadena, CA). The top 125 µl was collected, adjusted to a density of 1.063 g/ml with normal saline, and HDL was separated from more buoyant lipoproteins with another 2 hr spin at 511,260 x g in the T120.1 rotor. HDL was collected in 125 µl from the bottom of the tube and dialyzed against 20 mM potassium phosphate buffer with 100 µM DTPA, pH 7.4. HDL concentrations are given as total protein level.

### Quantification of HDL particle size and concentration

HDL particle concentration (HDL-P) and size distribution were measured using calibrated ion mobility analysis (IMA).<sup>2-4</sup> This method yields a stoichiometry of APOA1 and sizes and relative

abundances of HDL subclasses that are in excellent agreement with those determined by non-denaturing gradient gel electrophoresis and analytical ultracentrifugation.<sup>3, 5, 6</sup> Particle concentration was calibrated using glucose oxidase and validated using external well-characterized plasma samples.

### **Effects of HDL on endothelial cells**

Mouse microvascular endothelial cells were isolated by a magnetic bead positive selection method from hearts using an ICAM-2 antibody, as previously described.<sup>7</sup> In short, endothelial cells from C57BL/6J mouse hearts were placed on collagen pre-coated plates and cultured in endothelial cell medium at 37°C for 7–14 days to promote mouse heart endothelial cell outgrowth prior to passaging. The culture medium was replaced every three days, and cell cultures were subcultured at 90–95% confluence before studied between passages 2–3. For experiments, cells were treated with HDL (10–100 µg/ml) in the medium without growth factors for 18 hr, followed by stimulation with mouse recombinant TNFα (20 ng/ml, R&D Systems, Minneapolis, MN) for 6 hr. After extensive washing and addition of primary mouse bone marrow monocytes (monocyte enrichment kit, Stemcell Technologies, Vancouver, Canada) that had been labeled with calcein-acetoxymethyl ester (Sigma-Aldrich) for 30 min at 37°C, monocyte adhesion was estimated based on emitted fluorescence, as described previously.<sup>8</sup>

### **Cholesterol uptake using Dil-labeled AcLDL**

For cholesterol uptake, BMDMs from C57BL/6J WT or ADAM17-deficient mice were cultured as described above in 24-well plates, and treated with 10 µg/ml Dil-labeled acetylated low-density lipoprotein (AcLDL) for 4 hr. The cells were then fixed for 10 min with 4% PFA and analyzed by fluorescence microscopy (Keyence All-in-One Fluorescence Microscope BZ-X800) at 20X magnification.

### **Lipogenesis assay**

BMDMs from C57BL/6J WT or ADAM17-deficient mice were labeled with 0.5 µCi [<sup>3</sup>H]sodium acetate per well (specific activity: >10 Ci/mmol; ViTrax; Placentia, CA) in the presence of 10 mM unlabeled sodium acetate for 18 hr. Cells were then washed twice with ice-cold PBS and scraped in 200 µl PBS for lipid extraction. Lipids were extracted according to a published method<sup>9, 10</sup> using 2:1 chloroform-methanol (v/v). Radioactivity in the chloroform phase containing total lipids was determined by mixing the samples with a scintillation cocktail (Insta-Fluor Plus, PerkinElmer Inc; USA) and using a TriCarb 2810 TR liquid scintillation analyzer.

### **References**

1. Berisha SZ, Brubaker G, Kasumov T, Hung KT, DiBello PM, Huang Y, Li L, Willard B, Pollard KA, Nagy LE, Hazen SL, Smith JD. Hdl from apoA1 transgenic mice expressing the 4wf isoform is resistant to oxidative loss of function. *J Lipid Res.* 2015;56:653-664
2. Fotakis P, Kothari V, Thomas DG, Westertep M, Molusky MM, Altin E, Abramowicz S, Wang N, He Y, Heinecke JW, Bornfeldt KE, Tall AR. Anti-inflammatory effects of hdl (high-density lipoprotein) in macrophages predominate over proinflammatory effects in atherosclerotic plaques. *Arterioscler Thromb Vasc Biol.* 2019;39:e253-e272
3. Hutchins PM, Ronsein GE, Monette JS, Pamir N, Wimberger J, He Y, Anantharamaiah GM, Kim DS, Ranchalis JE, Jarvik GP, Vaisar T, Heinecke JW. Quantification of hdl particle concentration by calibrated ion mobility analysis. *Clin Chem.* 2014;60:1393-1401
4. Pamir N, Hutchins PM, Ronsein GE, Wei H, Tang C, Das R, Vaisar T, Plow E, Schuster V, Koschinsky ML, Reardon CA, Weinberg R, Dichek DA, Marcovina S, Getz GS, Heinecke JW. Plasminogen promotes cholesterol efflux by the abca1 pathway. *JCI Insight.* 2017;2

5. Monette JS, Hutchins PM, Ronsein GE, Wimberger J, Irwin AD, Tang C, Sara JD, Shao B, Vaisar T, Lerman A, Heinecke JW. Patients with coronary endothelial dysfunction have impaired cholesterol efflux capacity and reduced hdl particle concentration. *Circ Res.* 2016;119:83-90
6. Vaisar T, Kanter JE, Wimberger J, Irwin AD, Gauthier J, Wolfson E, Bahnam V, Wu IH, Shah H, Keenan HA, Greenbaum CJ, King GL, Heinecke JW, Bornfeldt KE. High concentration of medium-sized hdl particles and enrichment in hdl paraoxonase 1 associate with protection from vascular complications in people with long-standing type 1 diabetes. *Diabetes Care.* 2020;43:178-186
7. Tsuchiya K, Tanaka J, Shuiqing Y, Welch CL, DePinho RA, Tabas I, Tall AR, Goldberg IJ, Accili D. Foxos integrate pleiotropic actions of insulin in vascular endothelium to protect mice from atherosclerosis. *Cell Metab.* 2012;15:372-381
8. Kanter JE, Kramer F, Barnhart S, Duggan JM, Shimizu-Albergine M, Kothari V, Chait A, Bouman SD, Hamerman JA, Hansen BF, Olsen GS, Bornfeldt KE. A novel strategy to prevent advanced atherosclerosis and lower blood glucose in a mouse model of metabolic syndrome. *Diabetes.* 2018;67:946-959
9. Akie TE, Cooper MP. Determination of fatty acid oxidation and lipogenesis in mouse primary hepatocytes. *J Vis Exp.* 2015:e52982
10. Fullerton MD, Ford RJ, McGregor CP, LeBlond ND, Snider SA, Stypa SA, Day EA, Lhotak S, Schertzer JD, Austin RC, Kemp BE, Steinberg GR. Salicylate improves macrophage cholesterol homeostasis via activation of ampk. *J Lipid Res.* 2015;56:1025-1033

### A Gating strategy for CD115+ monocytes

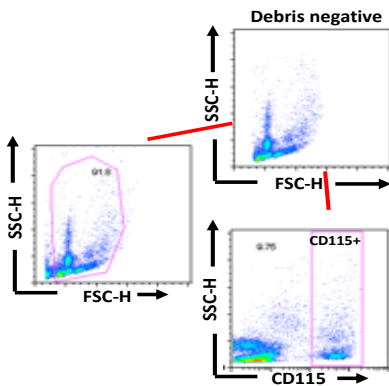

### B Gating strategy for BODIPY

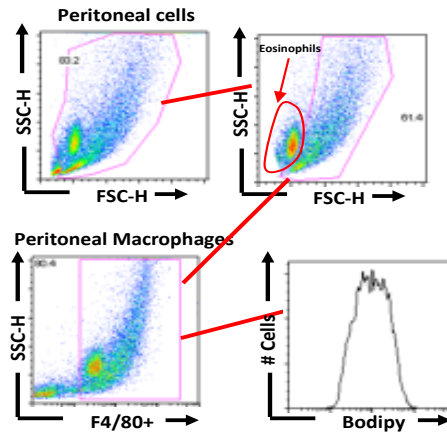

### C Unsorted peritoneal cells

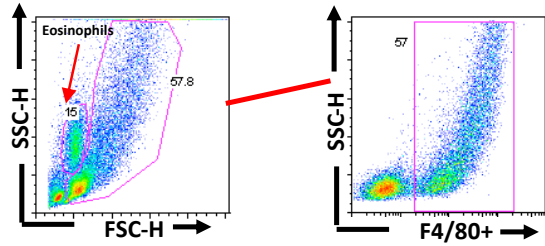

### Sorted peritoneal cells

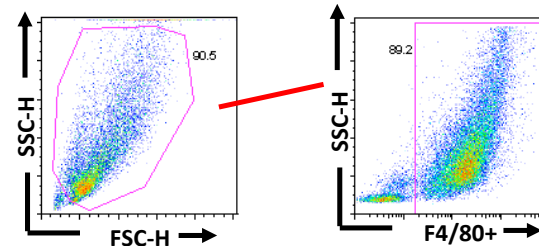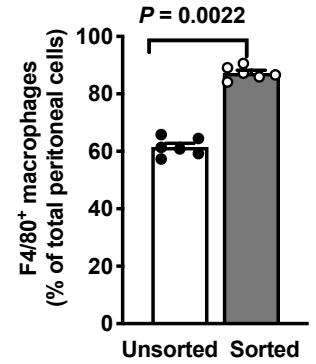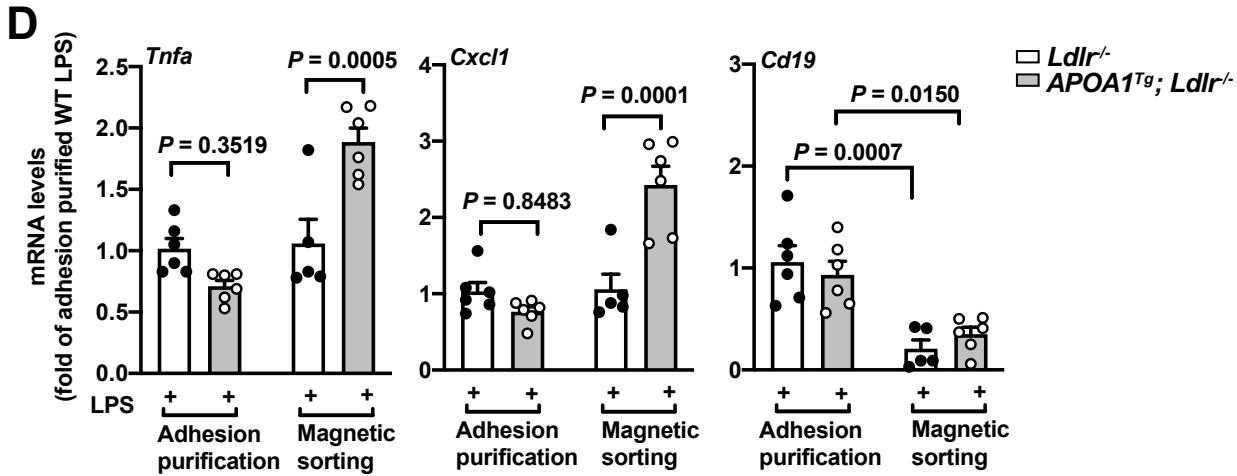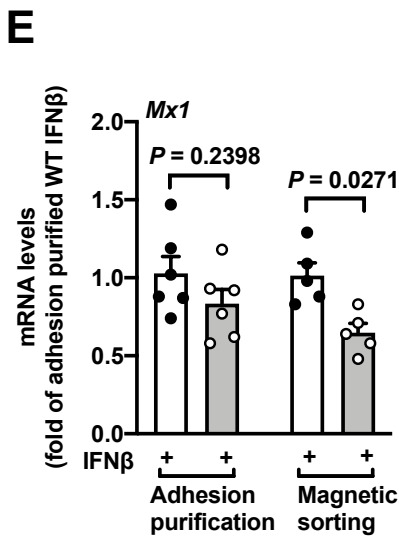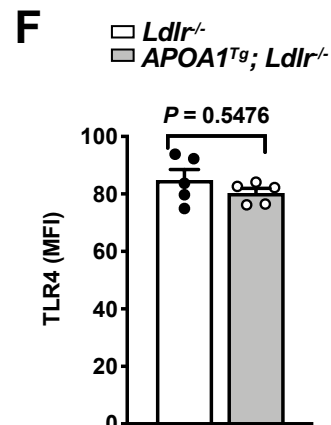

**Supplemental Figure I. A.** Gating strategy for CD115. **B.** Gating strategy for BODIPY in thioglycolate-elicited peritoneal macrophages. **C.** Gating strategy for F4/80+ macrophages from thioglycollate-elicited peritoneal cells before and after sorting using a macrophage negative selection kit. Cell population purity is shown on the right. **D.** Peritoneal cells from male *Ldlr*<sup>-/-</sup> and *APOA1*<sup>Tg</sup>; *Ldlr*<sup>-/-</sup> mice were collected 4 days after thioglycolate injection. Macrophages were purified from other cell types either by 1 hr adhesion or by using a macrophage negative selection kit followed by 1 hr adhesion before stimulation with LPS (10 ng/ml) or IFN $\beta$  (1 ng/ml) for 4 hr. At the end of treatment, the effect on gene expression of *Tnfa*, *Cxcl1* and *Cd19* in LPS-stimulated cells was measured by qPCR (n=5-6). **E.** Gene expression of *Ifit2* and *Mx1* in IFN $\beta$ -stimulated cells was determined by qPCR (n=5-6). **F.** Peritoneal cells from male *Ldlr*<sup>-/-</sup> and *APOA1*<sup>Tg</sup>; *Ldlr*<sup>-/-</sup> mice were collected 4 days after thioglycolate injection. Macrophages were isolated from other cell types using a macrophage isolation kit and cell surface expression of TLR4 was determined by flow cytometry. Data are shown as mean  $\pm$  SEM. *P* values were determined by unpaired two-tailed Mann-Whitney test (C, F) and by two-way ANOVA followed by Sidak's multiple comparison tests (D, E).

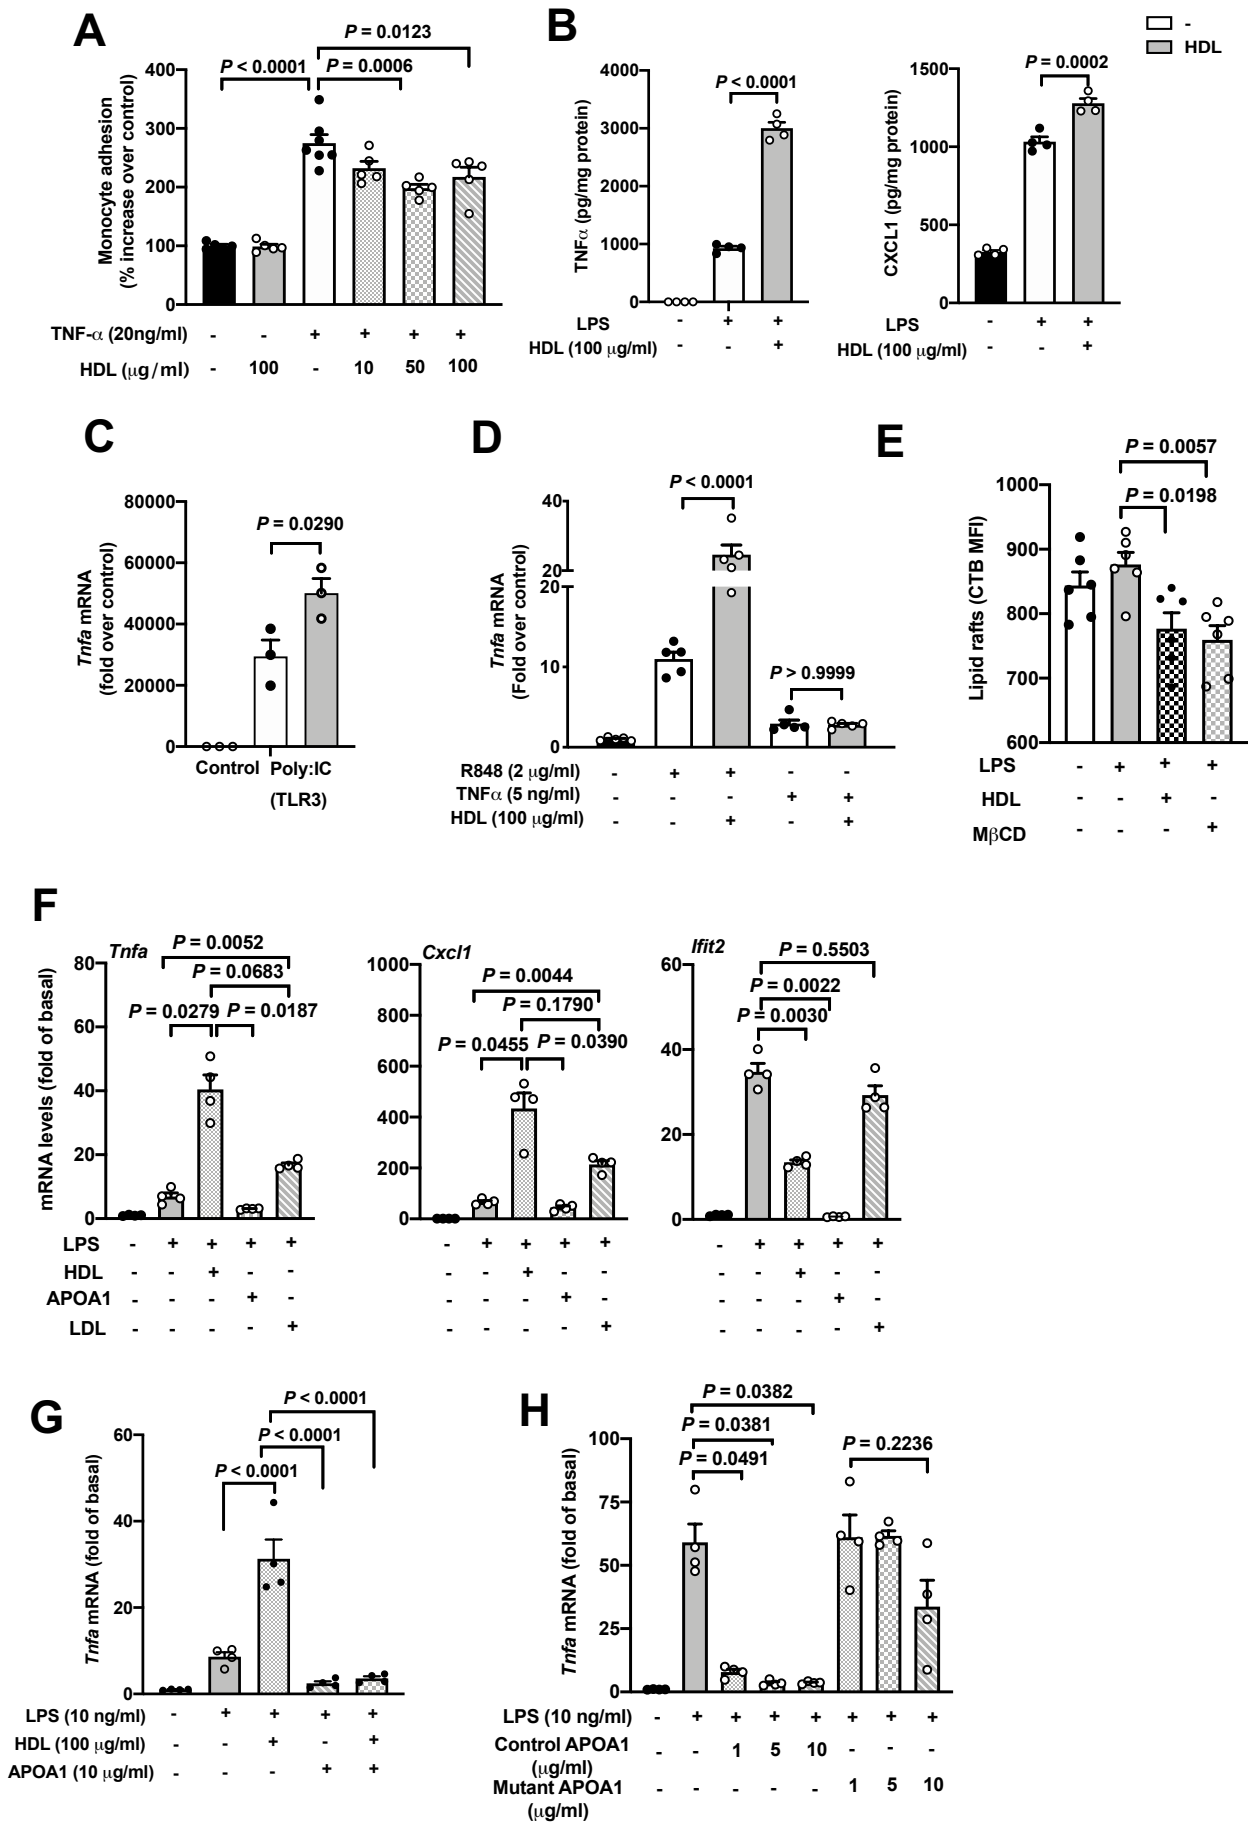

**Supplemental Figure II. A.** Mouse heart microvascular endothelial cells were pre-treated with HDL at different concentrations for 18 hr. The cells were then stimulated with TNF $\alpha$  (20 ng/ml) for an additional 6 hr. Primary mouse bone marrow monocytes were added to the monolayer of TNF $\alpha$ -stimulated endothelial cells to determine the effect of HDL on adhesion of monocytes to the endothelium. **B.** BMDMs from female C57BL/6J mice were primed with HDL (100  $\mu$ g/ml) for 18 hr, washed and stimulated with LPS (10 ng/ml) for 4 hr. At the end of the treatment, conditioned media were used to analyze soluble TNF $\alpha$  and CXCL1 (n=4). **C.** Effect of HDL on poly:IC (10  $\mu$ g/ml)-induced gene expression of *Tnfa*. **D.** BMDMs from female C57BL/6J mice were pre-treated with HDL (100  $\mu$ g/ml for 18 hr) and the cells were then stimulated with LPS (10 ng/ml), R848 (2  $\mu$ g/ml), or TNF $\alpha$  (5 ng/ml) in the absence of HDL. At the end of the 4 hr stimulation, the cells were used to analyze gene expression of *Tnfa*. **E.** BMDMs from male C57BL/6J mice were treated with HDL (100  $\mu$ g/ml, 18 hr) or methyl  $\beta$ -cyclodextrin (M $\beta$ CD, 10  $\mu$ M, 1 hr), washed and stimulated with LPS (10 ng/ml) for 4 hr. At the end of the treatment, the cells were stained for lipid raft with cholera toxin B (CTB) and mean fluorescent intensity (MFI) was determined by flow cytometry (n=6; experiment performed twice with similar results). **F.** BMDMs from male C57BL/6J mice were primed with either HDL (100  $\mu$ g/ml), human APOA1 (50  $\mu$ g/ml) or LDL (100  $\mu$ g/ml) for 18 hr, washed and stimulated with LPS (10 ng/ml) for 4 hr. At the end of the treatment, cells were used to analyze gene expression *Tnfa*, *Cxcl1* and *Ifit2* (n=4; experiment performed twice with similar results). **G.** BMDMs from male C57BL/6J mice were pre-treated with HDL (100  $\mu$ g/ml) and APOA1 (10  $\mu$ g/ml) alone or in combination for 18 hr, washed and stimulated with LPS (10 ng/ml) for 4 hr. At the end of the treatment, cells were used to analyze gene expression *Tnfa*, (n=4). **H.** BMDMs from male C57BL/6J mice were primed with either control wildtype APOA1 or an APOA1 carboxyl-terminal deletion mutant at indicated concentrations for 18 hr, washed and stimulated with LPS (10 ng/ml) for 4 hr. At the end of the treatment, cells were used to analyze gene expression *Tnfa*, (n=4). Data are shown as mean  $\pm$  SEM. *P* values were determined by Brown-Forsythe and Welch ANOVA with Dunnett's multiple comparison tests (A, B – TNF $\alpha$ , E, F), one-way ANOVA followed by Tukey's multiple comparison tests (C, D, B – CXCL1, G) or by two-way ANOVA followed by Sidak's multiple comparison tests (H). Unless otherwise stated, data are representative of at least three independent experiments performed in replicates.



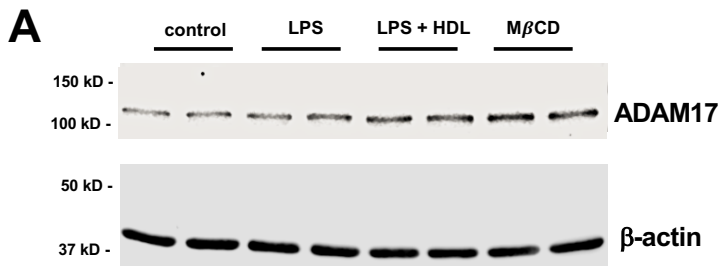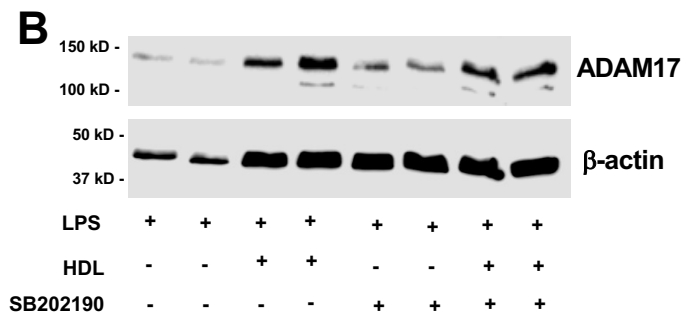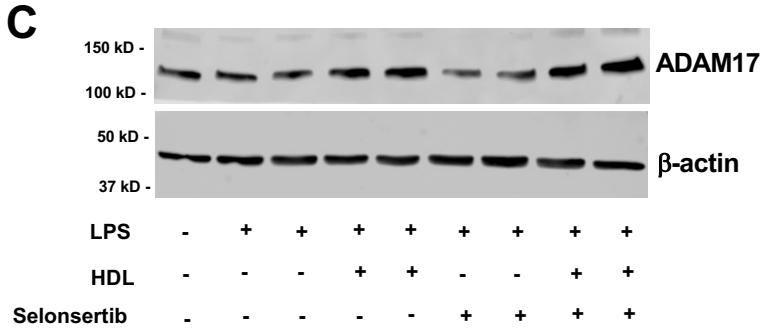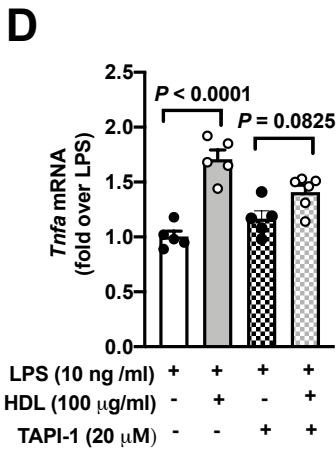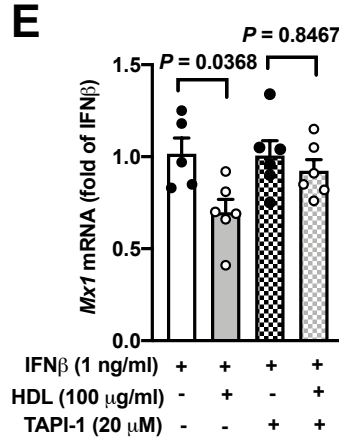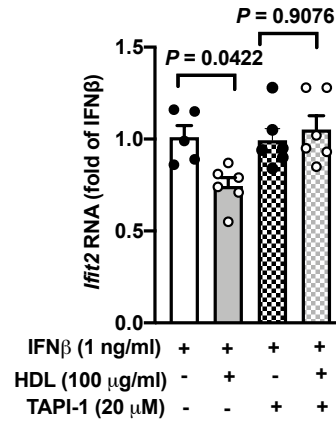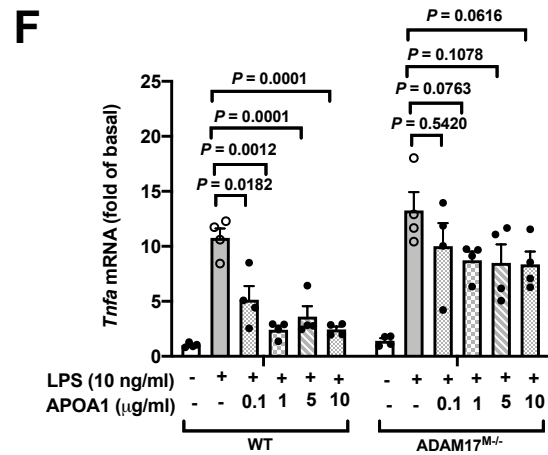

**Supplemental Figure III. A.** BMDMs were treated with either HDL (100 µg/ml, 18 hr) or methyl β-cyclodextrin (MβCD, 10 µM, 1 hr) and then washed and stimulated with LPS (10 ng/ml) for 4 hours. Protein expression of ADAM17 was analyzed at the end of the treatment by immunoblot. **B.** BMDMs were pre-treated with a p38MAPK inhibitor (SB202190, 10 µM) before HDL (100 µg/ml for 18 hr) treatment, washed, and then the cells were stimulated with LPS (10 ng/ml) for 4 hr in the presence of SB202190. At the end of the stimulation, protein expression of ADAM17 was analyzed by immunoblot. **C.** BMDMs were pre-treated with an ASK1 inhibitor (Selonsertib, 10 µM) before treatment with HDL (100 µg/ml for 18 hr), washed, and then stimulated with LPS (10 ng/ml) for 4 hr in the presence of Selonsertib. At the end of the stimulation, protein expression of ADAM17 was analyzed by immunoblot. **D.** BMDMs were pre-treated with TAPI-1 (20 µM, 48 hr) before HDL (100 µg/ml for 18 hr) treatment, and then stimulated with LPS (10 ng/ml) for 4 hr in the absence of HDL but in the presence of TAPI-1. At the end of the stimulation, the cells were used to analyze gene expression of *Tnfa* (n=5; experiment performed twice with similar results). **E.** BMDMs were pre-treated with TAPI-1 (20 µM, 48 hr) before HDL (100 µg/ml for 18 hr) treatment, and then stimulated with IFNβ (1 ng/ml) for 4 hr in the absence of HDL but in the presence of TAPI-1. At the end of the stimulation, the cells were used to analyze gene expression of *Mx1* and *Iffit2* (n=5-6). **F.** BMDMs from WT and ADAM17-deficient mice were pre-treated with APOA1 at indicated concentrations for 18 hr, washed and stimulated with LPS (10 ng/ml) for 4 hr. At the end of the treatment, the cells were used to analyze gene expression of *Tnfa*, (n=4). Data are shown as mean ± SEM. *P* values were determined by one-way ANOVA followed by Tukey's multiple comparison tests (D, E, F). Unless otherwise stated, data are representative of at least three independent experiments in BMDMs from male mice.

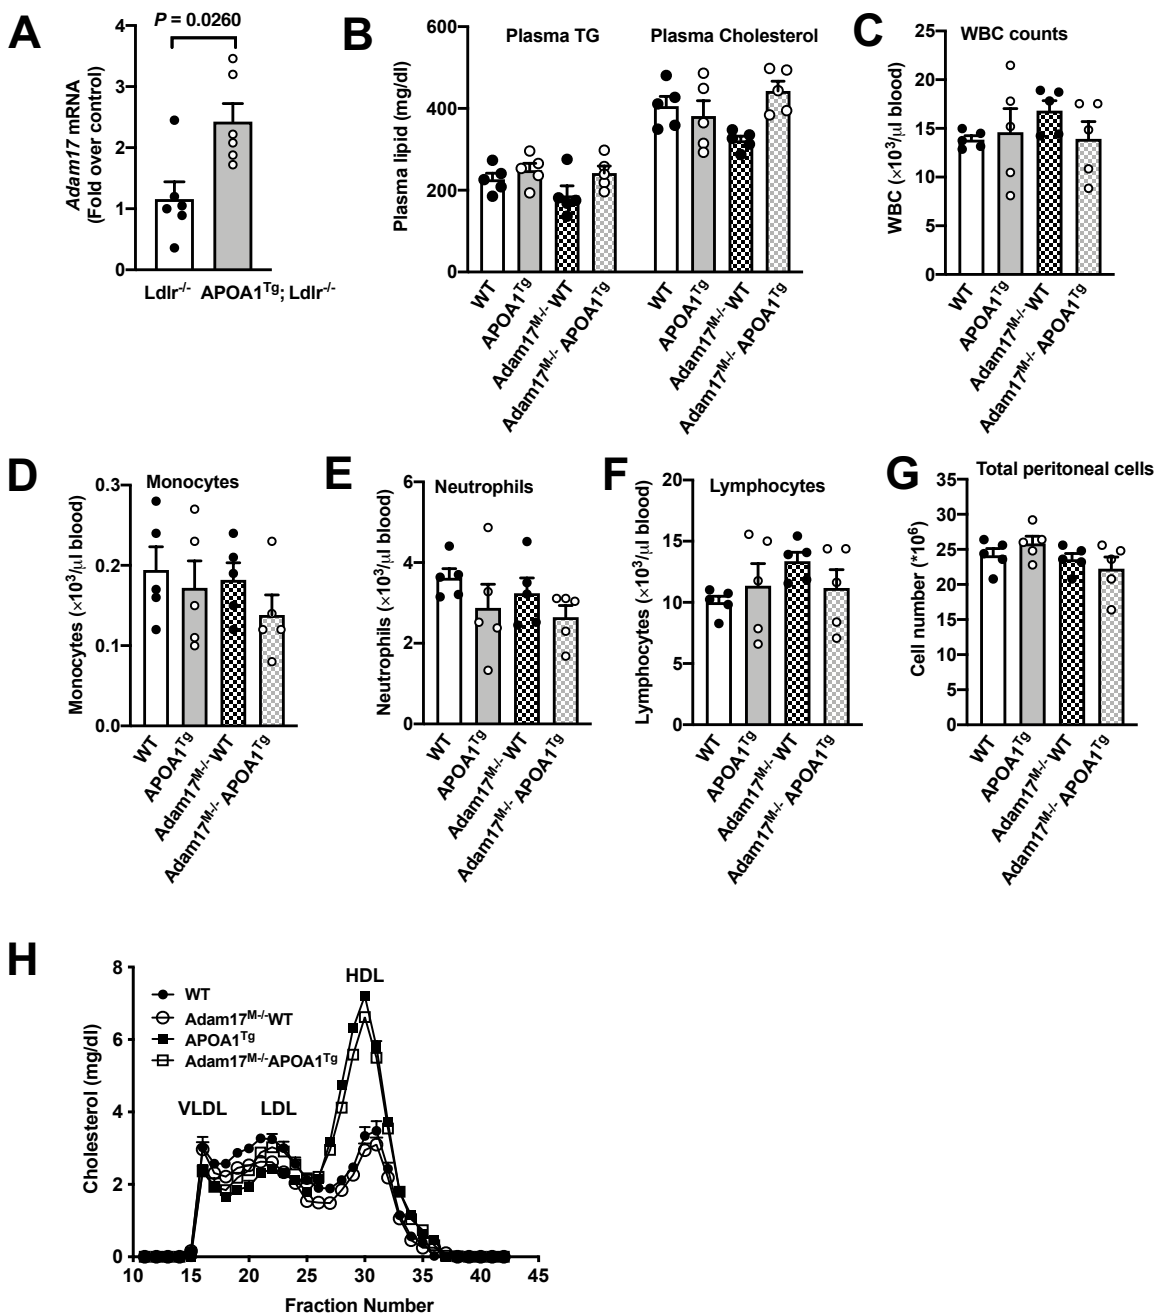

**Supplemental Figure IV. A.** Resident peritoneal cells from male *Ldlr*<sup>-/-</sup> and *APOA1*<sup>Tg</sup>; *Ldlr*<sup>-/-</sup> mice were adhesion purified for 1 hr and then analyzed for the gene expression of *Adam17* (n=5). **B.** Bone marrow was harvested from myeloid cell-targeted ADAM17-deficient mice or C57BL/6J WT controls, erythrocytes were removed, and the cells were transplanted into lethally irradiated (10 Gy) male *Ldlr*<sup>-/-</sup> and *APOA1*<sup>Tg</sup>; *Ldlr*<sup>-/-</sup> recipients (n=5). After 8 weeks of recovery, plasma cholesterol and triglycerides were measured using colorimetric assays. **C-F.** Blood was collected from the retro-orbital plexus under isoflurane sedation with EDTA as an anticoagulant. White blood cell (WBC) (**C**), total blood monocytes (**D**), neutrophils (**E**), and lymphocytes (**F**) were determined using a Hemavet automated counter. **G.** Thioglycolate-elicited peritoneal cells collected by peritoneal lavage were counted manually using a hemocytometer. **H.** Cholesterol lipoprotein profiles. Three plasma samples were analyzed per group. Plasma was pooled from a total of 5 animals per group. Data are shown as mean  $\pm$  SEM. *P*-values were determined by unpaired two-tailed Mann-Whitney test (A) and one-way ANOVA (B-G).

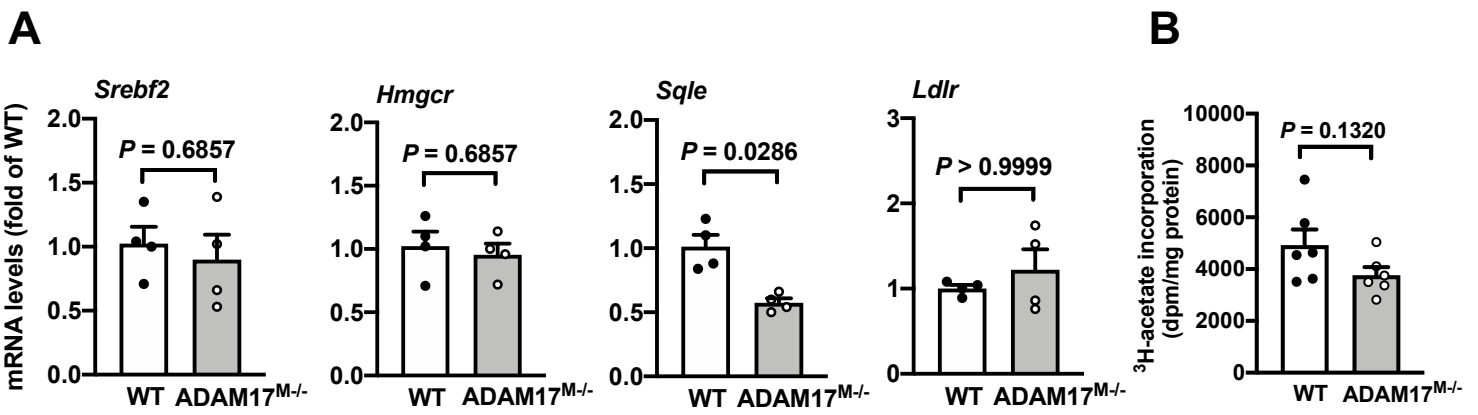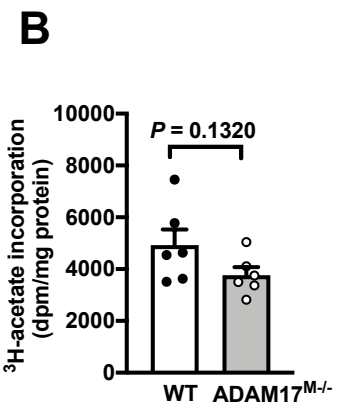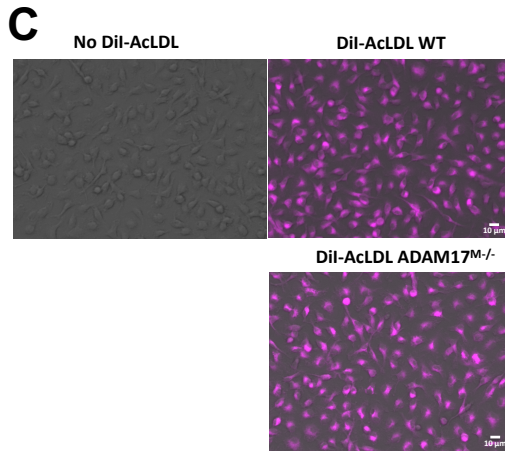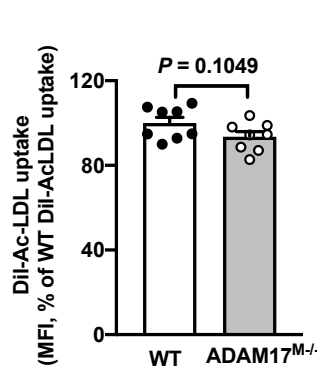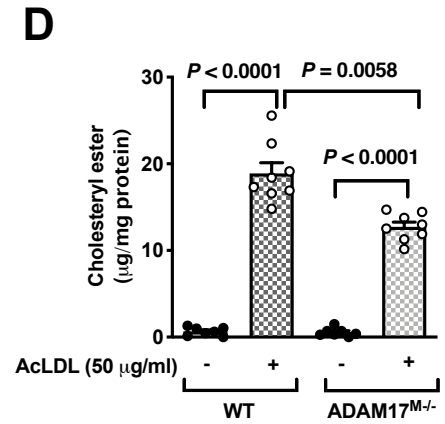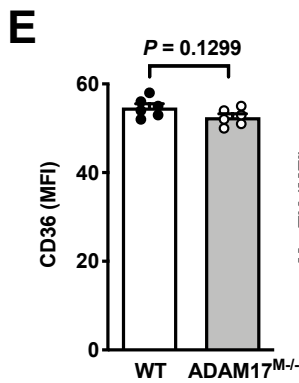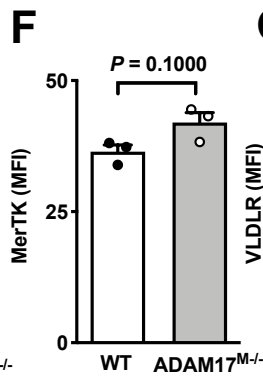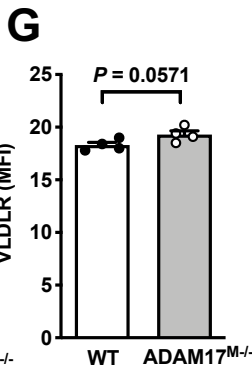

**H** Designing of guide sequence for CRISPR/Cas9 gene editing of TREM2

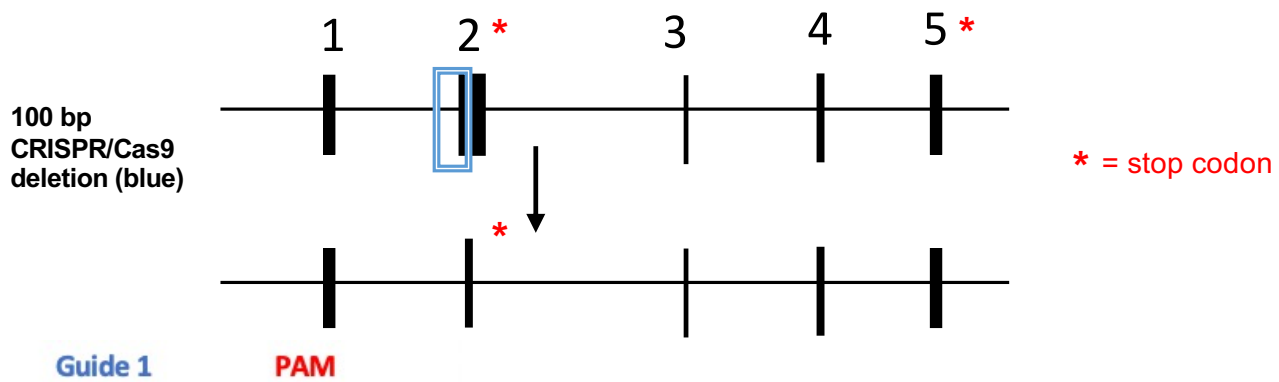

5'-TCAACACCACGGTGCTGCAGGGCATGGCCGGCCAGTCCTTGAGGGTGTGTCATGTACTTATGACGCCTTGAAGCACTGGGGGAGACGCAAGGCCTGGTGTCCGCAGCT-3'  
 3'-AGTTGTGGTGCCACGACGTCCTCCGTACCGCCGGTACGGAAC TCCCAGTATCATGAATACTGCGGAACCTCGTGACCCCTCTCGGTTCCGGACCACAGCCGTCGA-5'

PAM Guide 2

**Supplemental Figure V. A.** C57BL/6J WT or ADAM17-deficient BMDMs were used to analyze gene expression of *Srebf2*, *Sqle*, *Hmgcr*, and *Ldlr* (n=4). **B.** BMDMs from C56BL/6 mice were incubated in the presence of <sup>3</sup>H-acetate, and <sup>3</sup>H-acetate incorporation into cellular lipids was analyzed as a measure of lipogenesis. **C.** C57BL/6J WT or ADAM17-deficient BMDMs were treated with Dil-labeled AcLDL (10 µg/ml). After 4 hr, lipid uptake was visualized with fluorescence microscopy (Dil in red, nuclei stained with DAPI in blue), and quantified. The results are shown as mean fluorescence intensity; percentage of BMDMs from WT mice (n=8). **D.** BMDMs from C57BL/6J mice were loaded with cholesterol using acetylated LDL (AcLDL; 50 µg/ml, 48 hr) and the cellular content of cholesteryl esters were analyzed. **E-G.** Effect of HDL (100 µg/ml) on cell surface expression of ADAM17 targets by flow cytometry in WT and ADAM17-deficient BMDMs. **E.** CD36, **F.** MerTK, and **G.** VLDL receptor. **H.** Location of CRISPR/Cas9 target sequences. Data are shown as mean ± SEM. *P*-values were determined by one-way ANOVA followed by Tukey's multiple comparison tests (D) and unpaired two-tailed Mann-Whitney test (A, C, E-G). Data are representative of at least three independent experiments in BMDMs from male mice.

**Supplemental Table I: List of primers**

| <b>Gene</b>   | <b>Forward sequence</b>           | <b>Reverse sequence</b>       |
|---------------|-----------------------------------|-------------------------------|
| <i>Abca1</i>  | CAGCTTCCATCCTCCTTGTC              | CCACATCCACAACGTGTCTGG         |
| <i>Abcg1</i>  | GGGATCTCTGGGAAATTCACAGTG          | GTGAGCAGAGCTTCTGGTAGCAAAC     |
| <i>Adam17</i> | GGCAGAATATAACGTAGAGCCACT (Exon 4) | CTTCAGACTTATACACCAGC (Exon 5) |
| <i>Ccl2</i>   | TTAAAAACCTGGATCGGAACCAA           | GCATTAGCTTCAGATTTACGGGT       |
| <i>Cd19</i>   | GGAGGCAATGTTGTGCTGC               | ACAATCACTAGCAAGATGCCC         |
| <i>Cxcl1</i>  | TGGCTGGGATTCACCTCAAG              | CCGTTACTTGGGGACACCTT          |
| <i>Hmgcr</i>  | GACTGTGGTTTGTGAAGCCG              | GTTGTAGCCGCCTATCGTCC          |
| <i>Ifit2</i>  | CTGGGGAAACTATGCTTGGGT             | ACTCTCTCGTTTTGGTTCTTGG        |
| <i>Ifit3</i>  | AGTGAGGTCAACCGGGAATCT             | TCTAGGTGCTTTATGTAGGCCA        |
| <i>Il1b</i>   | GGGCTGCTCCAAACCTTTG               | TGATACTGCCTGCCTGAAGCTC        |
| <i>Irf7</i>   | TCCAGTTGATCCGCATAAGGT             | CTTCCCTATTTTCCGTGGCTG         |
| <i>Ldlr</i>   | GGTATGAGGTTCTGTCCAT               | GGTATAGCCATCCTGGCTTC          |
| <i>Mx1</i>    | AAACCTGATCCGACTTCACTTCC           | TGATCGTCTTCAAGGTTTCCTTGT      |
| <i>Rn18S</i>  | CATTAAATCAGTTATGGTTCCTTTGG        | CCCGTCGGCATGTATTAGCT          |
| <i>Scrab1</i> | TCTGGCGCTTTTTTC- TATCGT           | ACGGCCCATACCTCTAGCTT          |
| <i>Sqle</i>   | CTGGGCCTTGGAGATACAGT              | TGCTTTCCGGAGACTCATGA          |
| <i>Srebf2</i> | TAACCCCTTGACTTCCTTGC              | CACACCATTTACCAGCCACA          |
| <i>Tnfa</i>   | CCCTCACACTCAGATCATCTTCT           | GCTACGACGTGGGCTACAG           |

## Major Resources Table

### Animals (in vivo studies)

| Species                                          | Vendor or Source                    | Background Strain | Sex         | Persistent ID / URL                                                               |
|--------------------------------------------------|-------------------------------------|-------------------|-------------|-----------------------------------------------------------------------------------|
| C57BL/6J                                         | The Jackson Laboratory Cat# 000664  | C57BL/6J          | Female/Male | <a href="https://www.jax.org/strain/000664">https://www.jax.org/strain/000664</a> |
| C57BL/6-Tg(APOA1) <sup>1Rub</sup> /J             | The Jackson Laboratory Cat# 001927  | C57BL/6J          | Male        | <a href="https://www.jax.org/strain/001927">https://www.jax.org/strain/001927</a> |
| B6.129S7- Ldlr <sup>tm1Her</sup> /J              | The Jackson Laboratory Cat# 002207  | C57BL/6J          | Male        | <a href="https://www.jax.org/strain/002207">https://www.jax.org/strain/002207</a> |
| B6.129P2-Lyz2 <sup>tm1(cre)lfo</sup> /J          | The Jackson Laboratory Cat # 004781 | C57BL/6J          | Male        | <a href="https://www.jax.org/strain/004781">https://www.jax.org/strain/004781</a> |
| Lyz2 <sup>Cre/Cre</sup> ; Adam1 <sup>fl/fl</sup> | This study                          | C57BL/6J          | Male        |                                                                                   |

### Genetically Modified Animals

|                 | Species                                 | Vendor or Source                                                                                     | Background Strain | Other Information                                                                                                                                       | Persistent ID / URL                                                               |
|-----------------|-----------------------------------------|------------------------------------------------------------------------------------------------------|-------------------|---------------------------------------------------------------------------------------------------------------------------------------------------------|-----------------------------------------------------------------------------------|
| Parent - Male   | C57BL/6J                                | The Jackson Laboratory Cat# 000664                                                                   | C57BL/6J          |                                                                                                                                                         | <a href="https://www.jax.org/strain/000664">https://www.jax.org/strain/000664</a> |
| Parent - Female | C57BL/6J                                | The Jackson Laboratory Cat# 000664                                                                   | C57BL/6J          |                                                                                                                                                         | <a href="https://www.jax.org/strain/000664">https://www.jax.org/strain/000664</a> |
| Parent - Male   | B6.129S7- Ldlr <sup>tm1Her</sup> /J     | The Jackson Laboratory Cat# 002207                                                                   | C57BL/6J          | These mice were crossed to generate APOA1 <sup>Tg</sup> Ldlr <sup>-/-</sup> and Ldlr <sup>-/-</sup> littermates                                         | <a href="https://www.jax.org/strain/002207">https://www.jax.org/strain/002207</a> |
| Parent - Female | C57BL/6-Tg(APOA1) <sup>1Rub</sup> /J    | The Jackson Laboratory Cat# 001927                                                                   | C57BL/6J          |                                                                                                                                                         | <a href="https://www.jax.org/strain/001927">https://www.jax.org/strain/001927</a> |
| Parent - Male   | Adam17 <sup>flox/flox</sup>             | Elaine W. Raines, Department of Pathology, University of Washington, Seattle, WA (PMCID: PMC3622831) | C57BL/6J          | These mice were crossed to generate Lyz2 <sup>Cre/Cre</sup> ; Adam17 <sup>Wt/Wt</sup> and Lyz2 <sup>Cre/Cre</sup> ; Adam17 <sup>fl/fl</sup> littermates |                                                                                   |
| Parent - Female | B6.129P2-Lyz2 <sup>tm1(cre)lfo</sup> /J | The Jackson Laboratory Cat # 004781                                                                  | C57BL/6J          |                                                                                                                                                         | <a href="https://www.jax.org/strain/004781">https://www.jax.org/strain/004781</a> |

## Antibodies

| Target antigen                      | Vendor or Source | Catalog #        | Working concentration               | Lot # (preferred but not required) | Persistent ID / URL |
|-------------------------------------|------------------|------------------|-------------------------------------|------------------------------------|---------------------|
| p-p38MAPK                           | Cell signaling   | Cat # 9211       | Not available<br>1:1000 from stock  |                                    |                     |
| p38MAPK                             | Cell signaling   | Cat # 9212       | Not available<br>1:2000 from stock  |                                    |                     |
| STAT1                               | Cell signaling   | Cat # 9172       | Not available<br>1:2000 from stock  |                                    |                     |
| p-STAT1                             | Cell signaling   | Cat # 9167       | Not available<br>1:1000 from stock  |                                    |                     |
| ADAM17                              | Cell signaling   | Cat # 3976       | Not available<br>1:1000 from stock  |                                    |                     |
| $\beta$ -actin                      | Sigma            | Cat # A1978      | Not available<br>1:10000 from stock |                                    |                     |
| Anti-rabbit IgG HRP-linked antibody | Cell signaling   | Cat # 7074       | Not available<br>1:3000 from stock  |                                    |                     |
| Anti-mouse IgG HRP-linked antibody  | GE Healthcare    | Cat # NA931      | Not available<br>1:10000 from stock |                                    |                     |
| CD16/CD32                           | eBioscience      | Cat # 14-0161    | 1:4000 from stock                   |                                    |                     |
| PE-labeled Trem2                    | Invitrogen       | Cat # MA5-28225  | 1:200 from stock                    |                                    |                     |
| PE-Cy7-labeled CD36 clone HM36      | Biolegend        | Cat # 102615     | 1:200 from stock                    |                                    |                     |
| APC-labeled MerTK clone DS5MMER     | eBioscience      | Cat # 17-5751-80 | 1:200 from stock                    |                                    |                     |
| FITC-labeled VLDL receptor          | Abcam            | Cat # ab75591    | 1:200 from stock                    |                                    |                     |
| PE-Cy7-labeled F4/80 clone BM8      | eBioscience      | Cat # 25-4801-82 | 1:2000 from stock                   |                                    |                     |
| V500-labeled CD11b clone M1/70      | BD Horizon       | Cat # 562127     | 1:1000 from stock                   |                                    |                     |
| Viability dye                       | eBioscience      | Cat # 65-0863    | 1:2 from stock                      |                                    |                     |
| PE-labeled CD115 clone AFS98        | eBioscience      | Cat # 12-1152-83 | 1:1000 from stock                   |                                    |                     |
| PE/Cy7-labeled TLR4-clone SA15-21   | Biolegend        | Cat # 145408     | 1:200 from stock                    |                                    |                     |



|                                  |             |                 |               |  |  |
|----------------------------------|-------------|-----------------|---------------|--|--|
| Mouse TNF $\alpha$ antibody      | R&D Systems | Cat # AF-410-SP | 10 $\mu$ g/ml |  |  |
| Normal goat IgG control antibody | R&D Systems | Cat # AB-108-C  | 10 $\mu$ g/ml |  |  |

### DNA/cDNA Clones

| Clone Name                                          | Sequence                                                      | Source / Repository | Persistent ID / URL |
|-----------------------------------------------------|---------------------------------------------------------------|---------------------|---------------------|
| Primers for Quantitative PCR                        | see Supplemental Table I                                      | This study          |                     |
| pSpCas9(BB)-2A-Puro (PX459) V2.0 plasmid            | Addgene                                                       | Cat # 62988         |                     |
| Single guide RNA (sgRNA) oligonucleotides for Trem2 | (sgRNA1; CTGCAGCACCGTGGTGTGA and sgRNA2;AAGGCCTGGTGTCGGCAGCT) | This study          |                     |

### Cultured Cells

| Name                                                                                         | Vendor or Source                                             | Sex (F, M, or unknown) |
|----------------------------------------------------------------------------------------------|--------------------------------------------------------------|------------------------|
| Bone marrow-derived macrophages                                                              | Derived from mouse strains described above                   | Female/Male            |
| Peritoneal macrophages                                                                       | Derived from mouse strains described above                   | Male                   |
| Bone marrow-derived monocytes                                                                | Derived from C57BL/6J mice described above                   | Male                   |
| Mouse heart endothelial cells                                                                | Derived from <i>Ldlr</i> <sup>-/-</sup> mice described above | Male                   |
| L cells (mouse fibroblasts derived from subcutaneous connective tissue; areolar and adipose) | ATCC <sup>®</sup> CRL2648 <sup>™</sup>                       | Male                   |

### Software and algorithms

| Name                   | Vendor or Source  | link                                                                                                                |
|------------------------|-------------------|---------------------------------------------------------------------------------------------------------------------|
| GraphPad Prism v8.4.3. | GraphPad Software | <a href="https://www.graphpad.com/scientificsoftware/prism/">https://www.graphpad.com/scientificsoftware/prism/</a> |

**Other**

| <b>Name</b>                                                           | <b>Vendor or Source</b>      | <b>Catalog #</b>  |
|-----------------------------------------------------------------------|------------------------------|-------------------|
| Lipopolysaccharide, ultrapure                                         | List Biological Laboratories | Cat# NC9633766    |
| Recombinant mouse IFN $\beta$                                         | R&D systems                  | Cat# 8234-MB      |
| Thioglycollate                                                        | BD                           | Cat# BD 292788    |
| Selonsertib                                                           | Selleckchem                  | Cat# S8292        |
| Methyl- $\beta$ -cyclodextrin                                         | Sigma                        | Cat# C4555        |
| Human acetylated LDL                                                  | Kalen Biomedical             | Cat# 770201       |
| Cyclic AMP                                                            | Sigma-Aldrich                | Cat# A6885        |
| Acyl-coenzyme A:cholesterol acyltransferase inhibitor (Sandoz 58-035) | Sigma-Aldrich                | Cat# S9318        |
| BODIPY 493/503                                                        | Invitrogen                   | Cat# D3922        |
| Quick-RNA Miniprep                                                    | Zymo Research                | Cat# R1055        |
| BCA protein assay kit                                                 | Pierce                       | Cat# 23225        |
| Supersignal West Pico Chemiluminescent substrate                      | Pierce                       | Cat# 34578        |
| Cholesterol E (total cholesterol assay)                               | Wako Diagnostics             | Cat# 999-02601    |
| Triglyceride Reagent                                                  | Sigma-Aldrich                | Cat # T2449       |
| Hemavet MULTI-TROL Controls Mouse                                     | Drew Scientific Inc          | Cat # 600065      |
| Macrophage Isolation Kit (Peritoneum), mouse                          | Miltenyi Biotec              | Cat # 130-110-434 |

| Name                                                  | Vendor or Source              | Catalog #        |
|-------------------------------------------------------|-------------------------------|------------------|
| Recombinant mouse TNF $\alpha$ (aa 80-235)            | R&D Systems                   | Cat # 410-MT     |
| p38 MAPK inhibitor (SB202190 )                        | Santa Cruz Biotechnology, Inc | Cat # sc-202334  |
| ADAM17 inhibitor (TAPI-1)                             | Tocris                        | Cat # 6162       |
| RPMI 1640                                             | Corning                       | Cat # 10-040-CV  |
| Protease Inhibitor Cocktail                           | Sigma-Aldrich                 | Cat # P8340      |
| GM6001                                                | Sigma-Aldrich                 | Cat # M5939      |
| Fetal bovine serum                                    | ThermoFisher Scientific       | Cat # 26140079   |
| Fast SYBR Green Master Mix                            | ThermoFisher Scientific       | Cat # K0223      |
| TNF $\alpha$ mouse ELISA Kit                          | ThermoFisher Scientific       | Cat # 88-7324-86 |
| CCL2 mouse ELISA Kit                                  | ThermoFisher Scientific       | Cat # 88-7391-88 |
| Mouse CXCL1/KC DuoSet ELISA                           | R&D Systems                   | Cat # DY453-05   |
| Peptide-N-glycosidase F                               | New England BioLabs           | Cat # P0704S     |
| Lipofectamine 3000 Reagent                            | ThermoFisher Scientific       | Cat # L3000001   |
| Maxima First Strand cDNA synthesis kit for RT-qPCR    | ThermoFisher Scientific       | Cat# K1642       |
| Filipin complex from <i>Streptomyces filipinensis</i> | Sigma                         | Cat # F9765      |
| Human APOA1                                           | Academy Bio-medical Co.       | Cat # 11P-UP205  |

|                                         |                                 |                     |
|-----------------------------------------|---------------------------------|---------------------|
| Sodium acetate, [ <sup>3</sup> H]       | ViTrax                          | Cat # VT211         |
| Sodium acetate trihydrate               | VWR International<br>J.T. Baker | Cat # 3462-05       |
| Insta-Fluor Plus Scintillation Cocktail | PerkinElmer Inc                 | Cat # 6013167       |
| Chloroform ACS reagent grade            | ThermoFisher<br>Scientific      | Cat #<br>RSOC00204C |
| Methanol                                | Sigma                           | Cat # 179337        |
| Glycine                                 | VWR International<br>J.T. Baker | Cat # JT0582-1      |
